# Supplementary material
Source: publisher figshare collection journal article supplement (https://acs.figshare.com/ndownloader/files/5700915)

**Figure Captions.**

**Figure S1.** 300 MHz  $^1\text{H}$  NMR spectrum of **2**, in dichloromethane- $d_2$  solution at 25 °C.

**Figure S2.** Cyclic voltammogram of **1** recorded with a freshly prepared solution in  $\text{CH}_3\text{CN}$ .

**Figure S3.** Electronic absorption spectrum of **3** in acetonitrile at ambient temperature. The inset shows the band at 915 nm.

**Figure S4.** Electronic absorption spectrum of **4** in acetonitrile at ambient temperature. The inset shows the band at 624 nm.

**Figure S5.** Top: differential pulse voltammogram of **4** at a scan rate of  $20\text{ mVs}^{-1}$ , peak to peak amplitude: 20 mV. Bottom: cyclic voltammogram of **4** in  $\text{CH}_3\text{CN}$  at a platinum electrode; scan rate:  $100\text{ mVs}^{-1}$ ; temperature:  $-20\text{ }^\circ\text{C}$ .

**Figure S1**

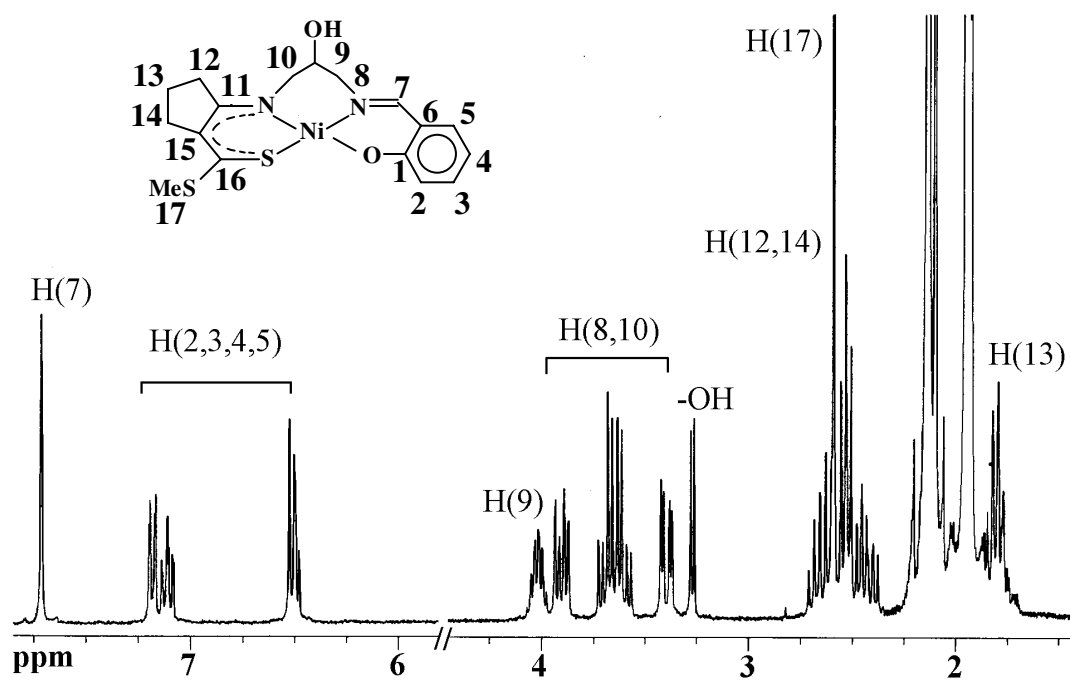

**Figure S2**

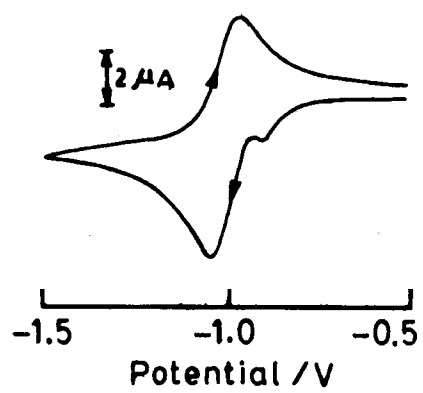

**Figure S3**

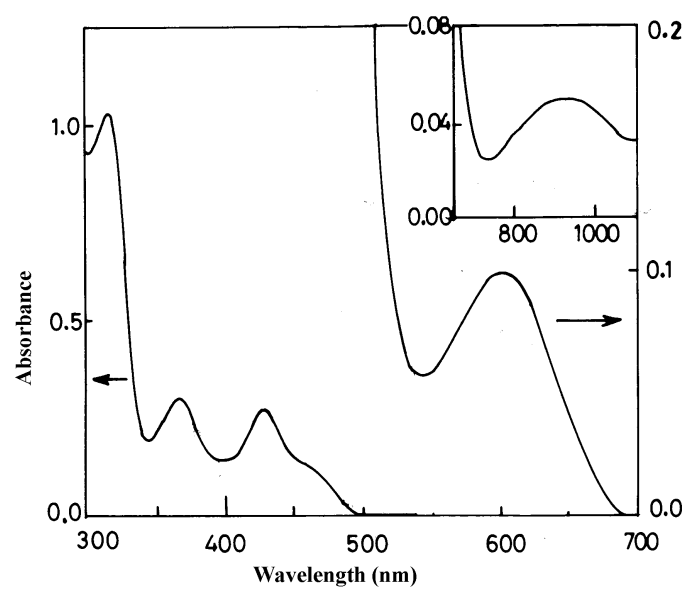

**Figure S4**

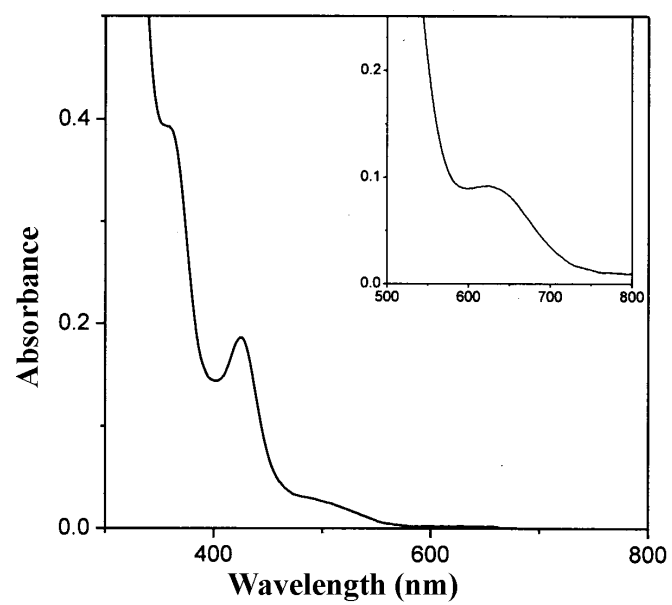

**Figure S5**

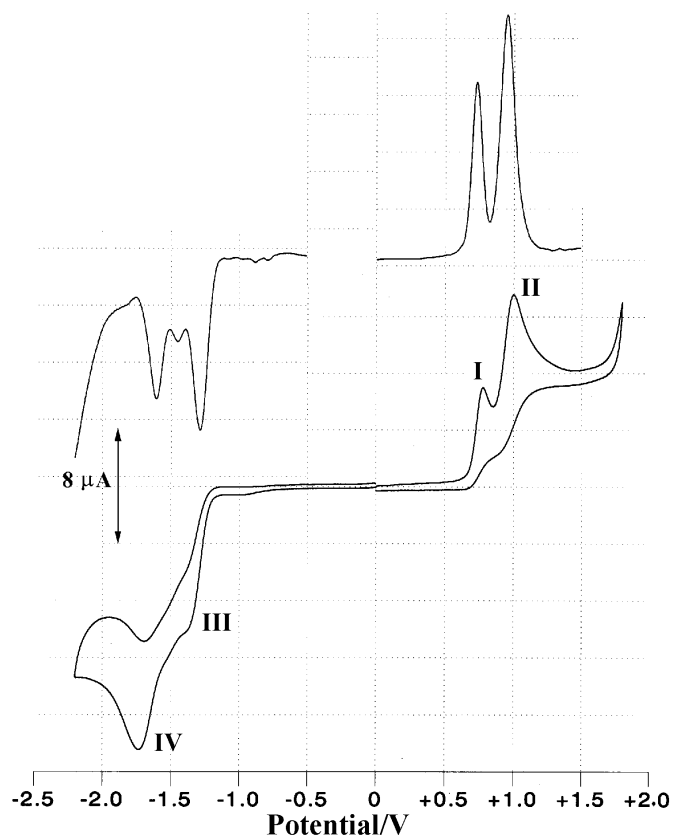

Supplement: Supplementary file 1 [file 5700915]
